# Supplementary material for: [Retracted] Novel lncRNA AL033381.2 Promotes Hepatocellular Carcinoma Progression by Upregulating PRKRA Expression
Source: Hindawi journal article supplement (doi:10.1155/2022/1125932), 2022-01-01
Supplement: f1 [file 1125932.f1.docx]

**Supplementary Figure S1**

**Figure S1.** The results of qRT-PCR showed that AL033381.2 was expressed in Hep3B, Huh-7, HepG2, and SK-HEP-1 cells. The relative mRNA expression (AL033381.2/GAPDH) was determined by the 2-ΔΔCt method.

**Supplementary Figure S2**

**
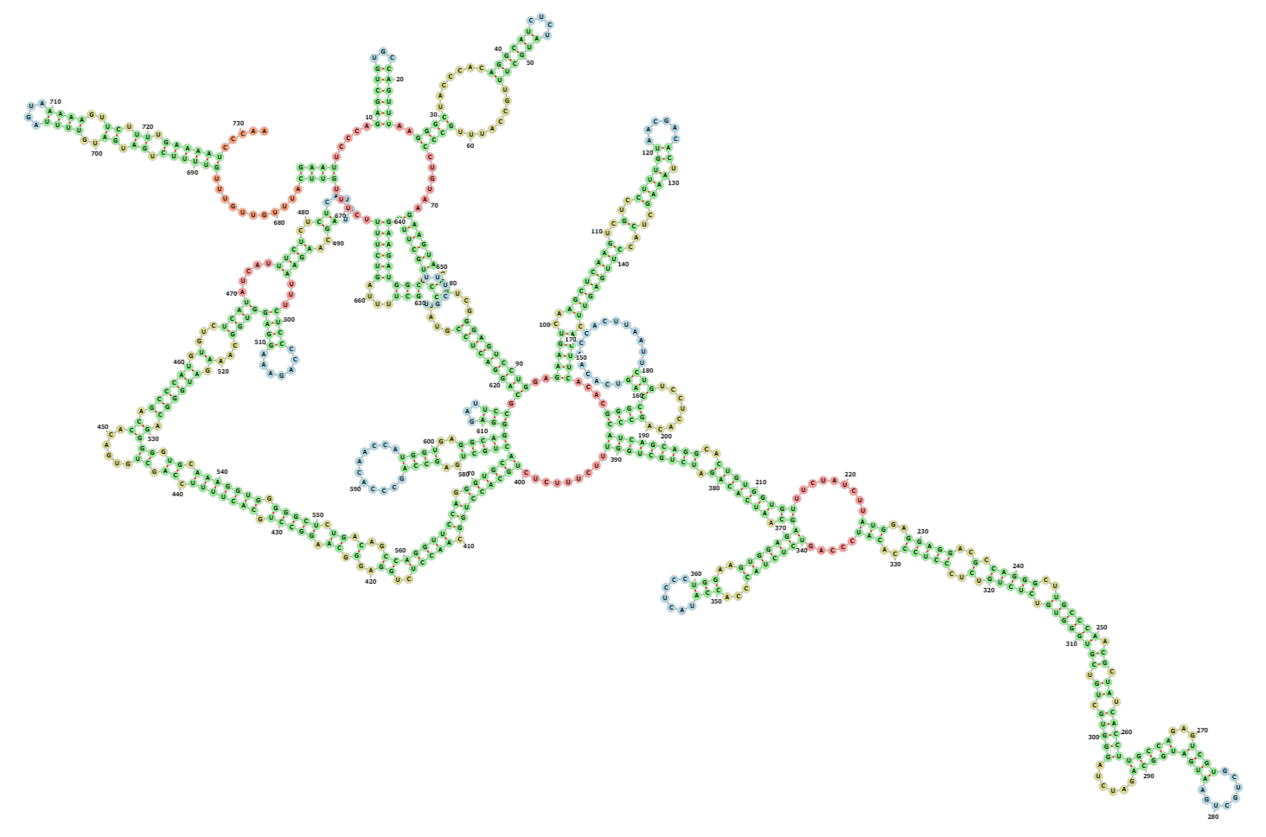
**

**Figure S2.** The secondary structure of AL033381.2 (ENST00000603854) is shown as predicted by lnCAR (<https://lncar.renlab.org>).

**Supplementary Figure S3**


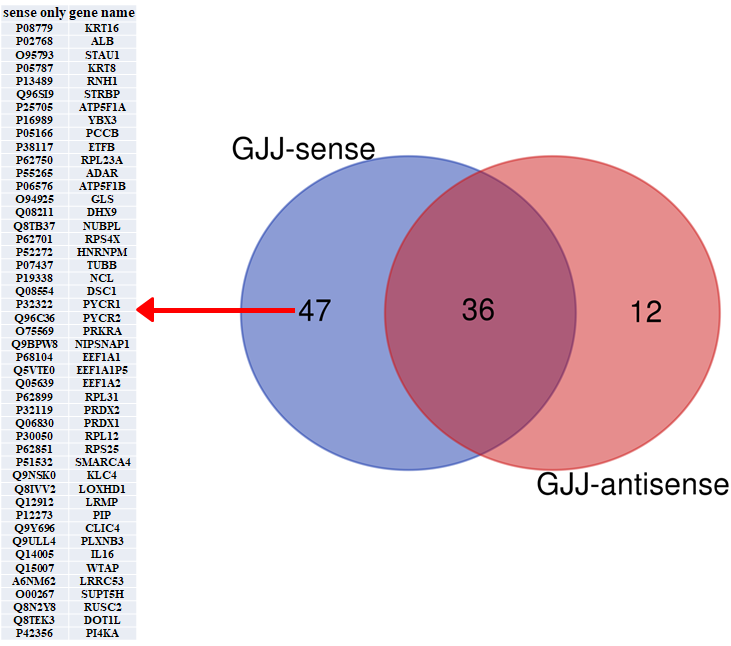


**Figure S3.** To exclude from antisense, mass spectrometry analysis showed the target gene list from AL033381.2 sense.

**Supplementary Figure S4**

**
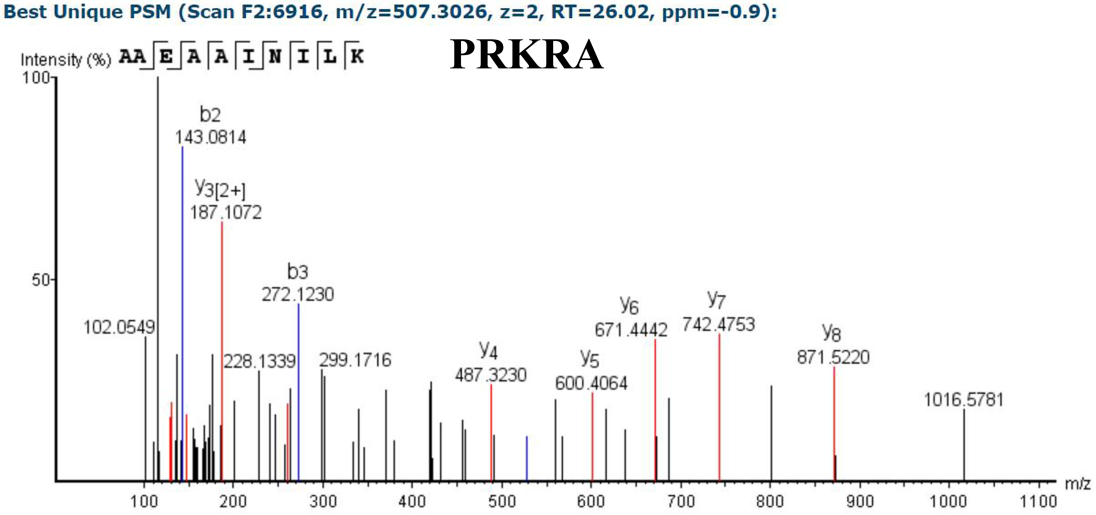
**

**Figure S4.** Mass spectrometry analysis of PRKRA binding to AL033381.2.

**Supplementary Figure S5**

**
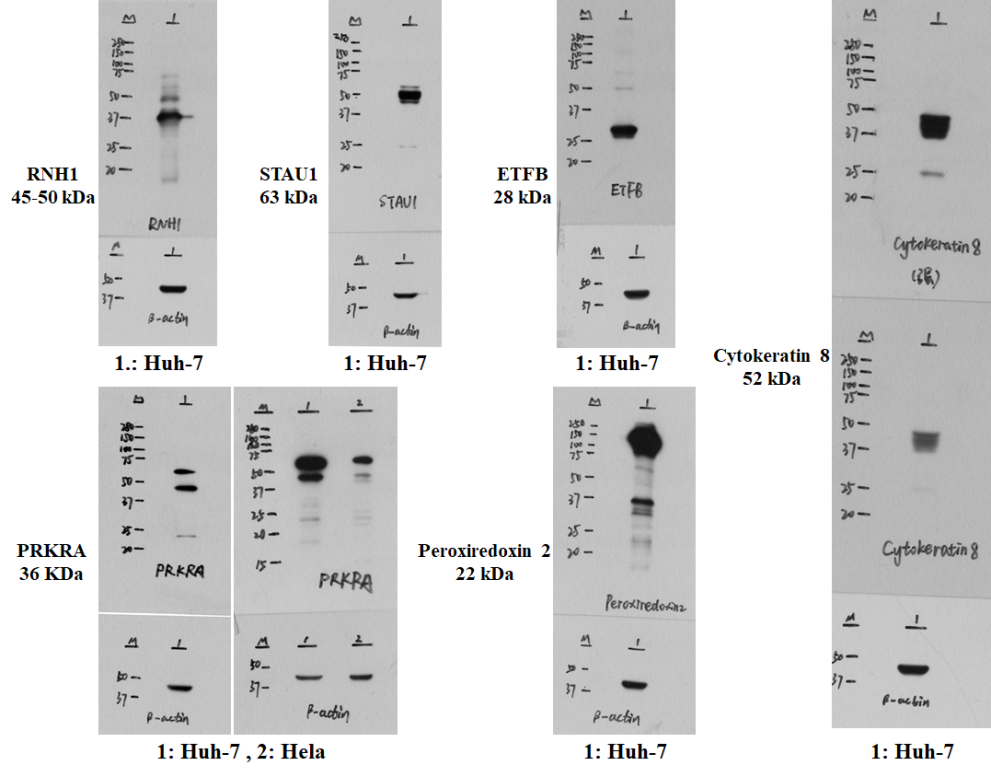
**

**Figure S5.** Western blot analysis for RNH1, STAU1, ETFB, PRKRA, Peroxiredoxin2 (PRDX2), and Cytokeratin8 (KRT8) protein levels in Huh-7 cell lysates.

**Supplementary Figure S6**

**
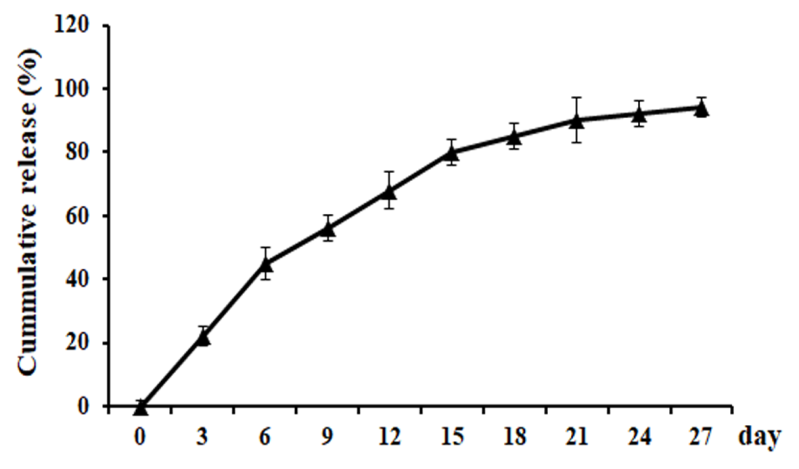
**

**Figure S6.** In vitro cumulative release profiles of siRNA from the nanoparticle/siRNA complexes.
